# Supplementary material for: Sustained-Release Microspheres of Rivoceranib for the Treatment of Subfoveal Choroidal Neovascularization
Source: MDPI journal article supplement (doi:10.3390/pharmaceutics13101548), 2021-09-24
Supplement: s1 [file s1]

# Supplementary Materials: Sustained-Release Microspheres of Rivoceranib for The Treatment of Subfoveal Choroidal Neovascularization

E Seul Kim, Min Sang Lee, Hayoung Jeong, Su Yeon Lim, Doha Kim, Dahwun Kim, Jaeback Jung, Siyan Lyu, Hee Joo Cho, Dong Min Kim, Wonhee Suh and Ji Hoon Jeong

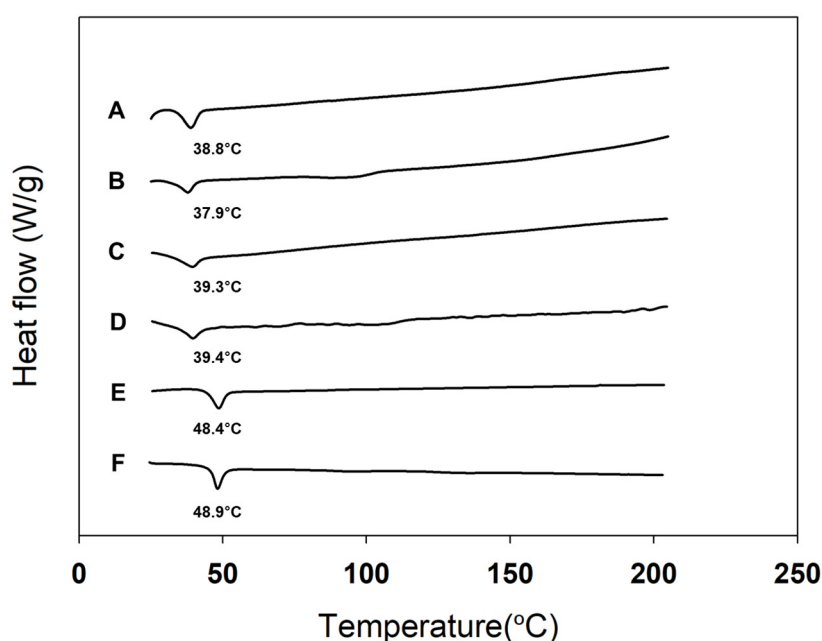

**Figure S1.** Differential scanning calorimetry (DSC) thermograms of (A) PLGA RG502 microsphere (drug free); (B) PLGA RG502/rivoceranib microsphere (502-2.0k); (C) PLGA RG502H microsphere (drug free); (D) PLGA RG502H/rivoceranib microsphere (502H-2.0k); (E) PLGA RG503H microsphere (drug free); (F) PLGA RG503H/rivoceranib microsphere (503H-2.0k). The downward peaks in the diagrams represent the endothermic behavior.
